# Supplementary material
Source: PubMed Central journal article supplement (PMC2780001)
Supplement: NIHMS149343-supplement-Supp1.pdf [file NIHMS149343-supplement-Supp1.pdf]

**Figure S1**

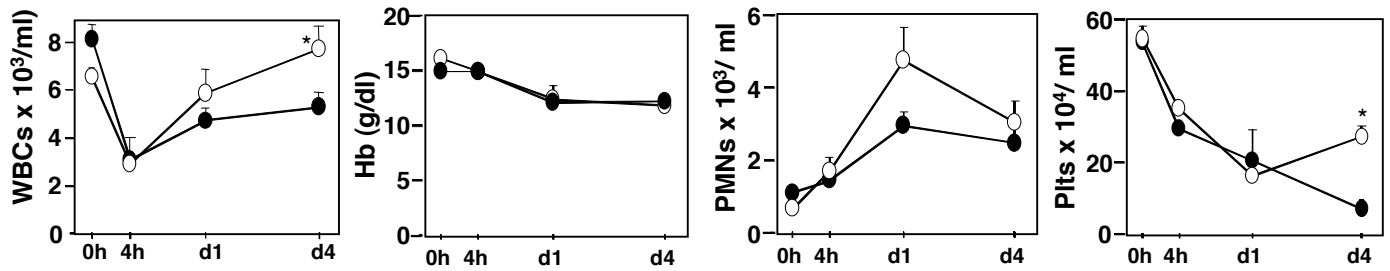

**Complete blood count and differential.** Blood samples taken from wild-type (closed circles) and Mac-1<sup>-/-</sup> (open circles) mice at the indicated times after induction of TGN were analyzed for white blood cell (WBC), RBC (Hb), neutrophil (PMN) and platelet counts.

**Figure S2**

|                              | Con IgG (n=4)   | $\alpha$ GPIb $\alpha$ (n=4) | P-value |
|------------------------------|-----------------|------------------------------|---------|
| BUN (mg/dl)                  | 105.7 $\pm$ 1.1 | 86.8 $\pm$ 8.4               | 0.067   |
| sCr (mg/dl)                  | 0.28 $\pm$ 0.01 | 0.24 $\pm$ 0.03              | 0.320   |
| LDH x 10 <sup>3</sup> (IU/l) | 1.85 $\pm$ 0.18 | 1.79 $\pm$ 0.12              | 0.765   |

**Platelet immunodepletion after TGN induction did not increase disease indices.** WT mice were intravenously injected with anti-GPIb $\alpha$  (40  $\mu$ g/mice) or control IgG (Con IgG) 24 hrs after TGN induction. Biochemical markers for renal function (BUN, sCr) and general organ damage (LDH) were comparable between the two groups. Data are the mean  $\pm$  SD
